# Supplementary material for: Evaluation of 6-Hydroxydopamine and Rotenone In Vitro Neurotoxicity on Differentiated SH-SY5Y Cells Using Applied Computational Statistics
Source: MDPI journal article supplement (doi:10.3390/ijms23063009), 2022-03-10
Supplement: s1 [file s1]

## Supplementary figures

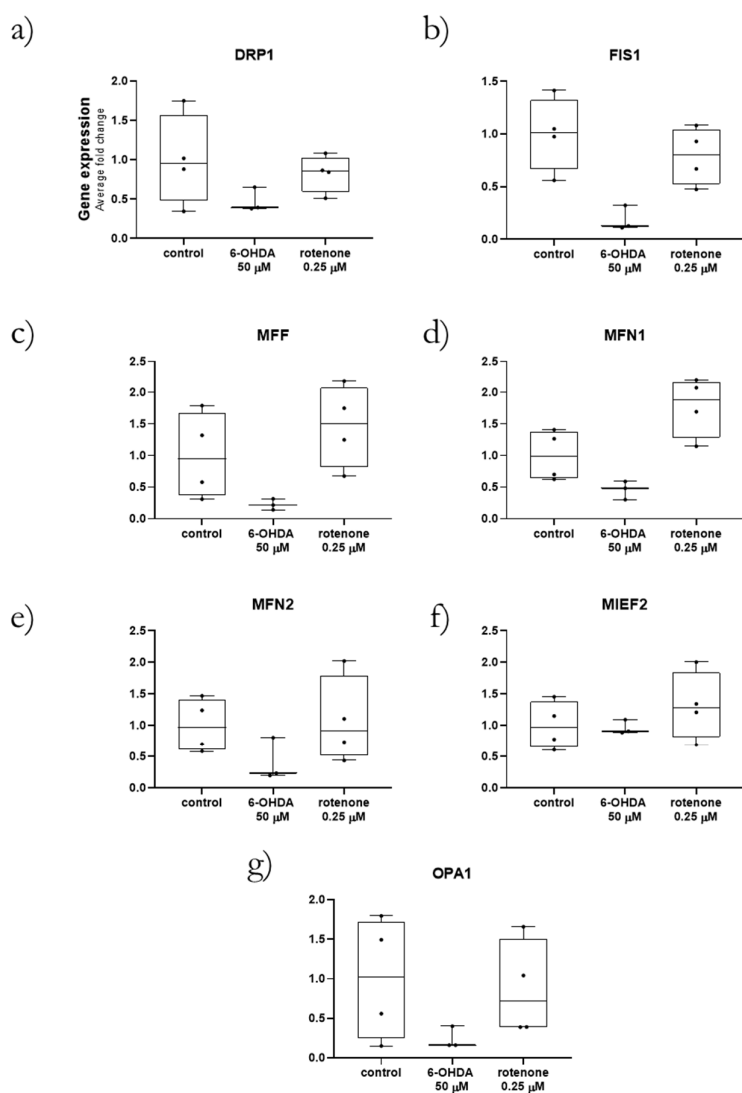

**Figure S1.** qPCR analysis of genes encoding proteins involved on mitochondrial fusion and fission. Transcript levels of dynamin-related protein 1 (DRP1) (a), mitochondrial fission 1 protein (FIS1) (b), mitochondrial fission factor (MFF) (c), mitofusin 1 (MFN1) (d), mitofusin 2 (MFN2) (e), mitochondrial elongation factor 2 (MIEF2) (f), and optic atrophy 1 protein (OPA1) (g) were evaluated after cells were incubated for 24 h with 50  $\mu$ M 6-OHDA or with 0.25  $\mu$ M rotenone. Data is represented in boxplots in which each dot represents an independent cell population (n = 3-4). Kruskal-Wallis test (One-way ANOVA on ranks) pairwise (control vs 6-OHDA or control vs rotenone) was used to assess statistical significance.

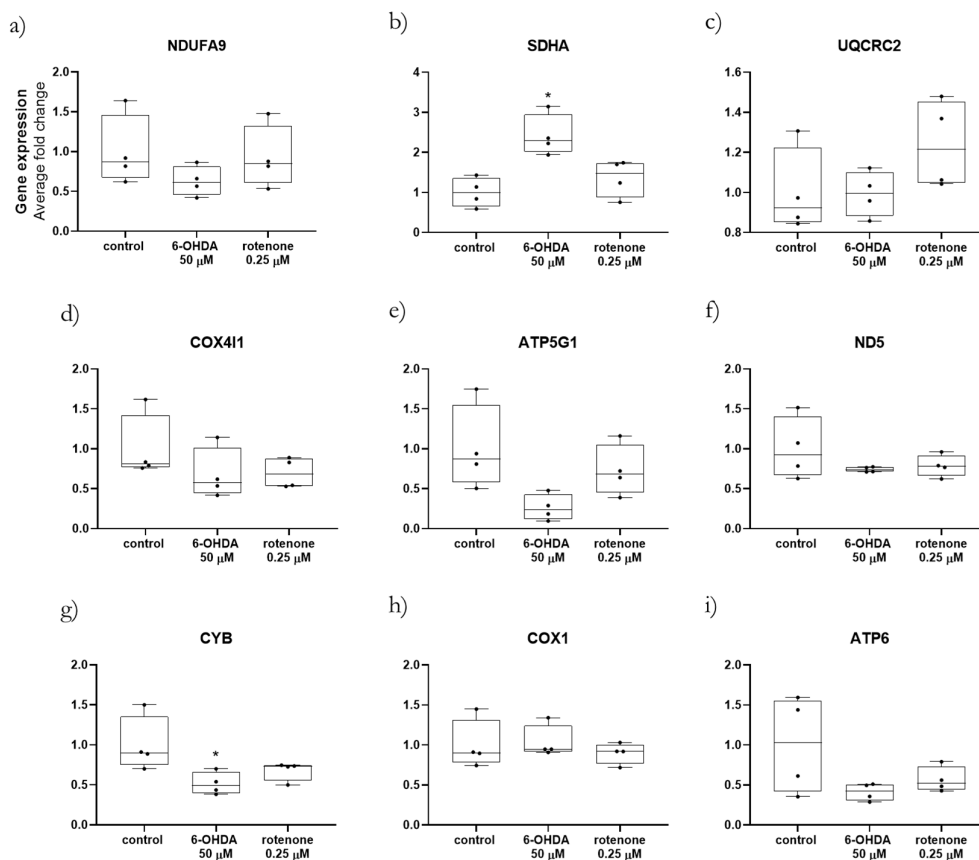

**Figure S2. qPCR analysis of electron transport chain complex and ATP synthase subunits encoded by nuclear and mtDNA were altered by both 6-OHDA and rotenone.** Nuclear-encoded ETC complex subunits NADH:Ubiquinone oxidoreductase subunit A9 (NDUFA9) (a), succinate dehydrogenase complex flavoprotein subunit A (SDHA) (b), ubiquinol-cytochrome c reductase core protein 2 (UQCRC2) (c), cytochrome c oxidase subunit 4I1 (COX4I1) (d), and ATP synthase membrane subunit c locus 1 (ATP5G1) (e), as well as mtDNA-encoded ETC complex subunits NADH:Ubiquinone oxidoreductase core subunit 5 (ND5) (f), cytochrome b (CYB) (g), cytochrome c oxidase I (COX1) (h), and ATP synthase membrane subunit 6 (ATP6) (i) mRNA levels were assessed in cells treated with 50  $\mu$ M 6-OHDA or with 0.25  $\mu$ M rotenone for 24 h. Data is represented in boxplots in which each dot represents an independent cell population ( $n = 4$ ). Kruskal-Wallis test (One-way ANOVA on ranks) pairwise (control vs 6-OHDA or control vs rotenone) was used to assess statistical significance, (\*)  $p < 0.05$ .

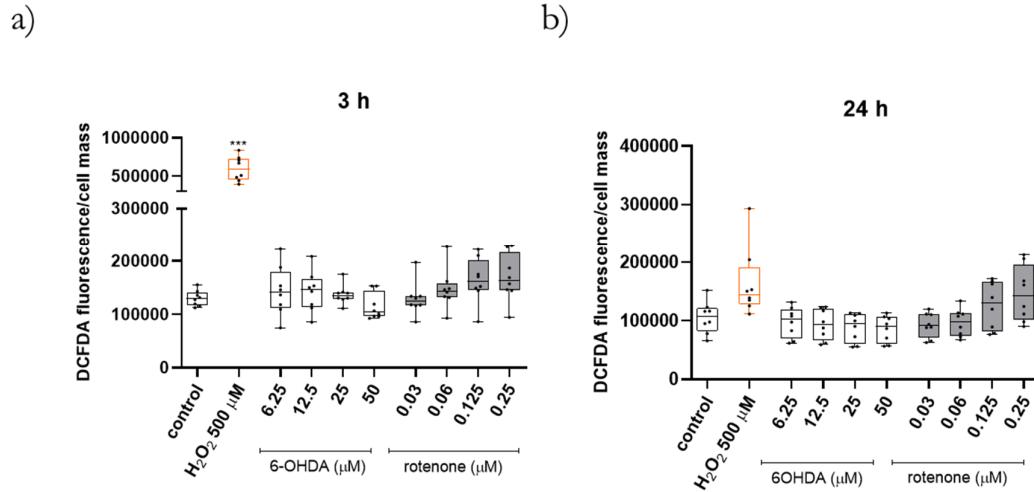

**Figure S3. Treatments with both compounds induced an increase in  $H_2$ DCFDA oxidation.** Cells were treated with non-toxic concentration of 6-OHDA and rotenone for 3 h (a) and 24 h (b) and consequently ROS production was assessed by measuring the fluorescent levels of  $H_2$ DCFDA. Hydrogen peroxide ( $H_2O_2$ ), 500  $\mu M$ , was used as positive control. Although no evident alteration in dye fluorescence intensity were found, rotenone-treated cells (0.125  $\mu M$  and 0.25  $\mu M$ ) displayed an average increase of 26% and 30% (respectively) when incubated for 3 h (a) and 19% and 39% increase when treated for 24 h (b).

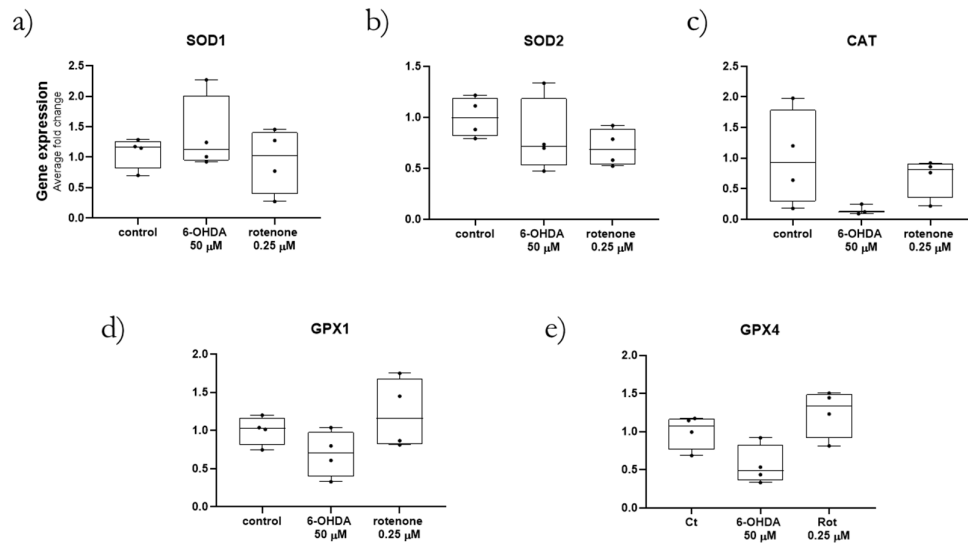

**Figure S4. qPCR analysis of selected antioxidant enzymes mRNA levels.** mRNA levels of superoxide dismutase 1 (SOD1) (a), superoxide dismutase 2 (SOD2) (b), catalase (CAT) (c), glutathione peroxidase 1 (GPX1) (d) and glutathione peroxidase 4 (GPX4) (e) were evaluated in cells treated for 24 h with 50  $\mu M$  6-OHDA and with 0.25  $\mu M$  rotenone. Data is represented in boxplots in which each dot represents an independent cell population ( $n = 3-4$ ). Kruskal-Wallis test (One-way ANOVA on ranks) pairwise (control vs 6-OHDA or control vs rotenone) was used to assess statistical significance.
